# Supplementary material for: Antiproliferative Activity of Hinokitiol, a Tropolone Derivative, Is Mediated via the Inductions of p-JNK and p-PLCγ1 Signaling in PDGF-BB-Stimulated Vascular Smooth Muscle Cells
Source: PubMed Central journal article supplement (PMC6272725; doi:10.3390/molecules20058198), 2015-05-07
Supplement: molecules-20-08198-s001.pdf [file molecules-20-08198-s001.pdf]

## Supplementary Materials

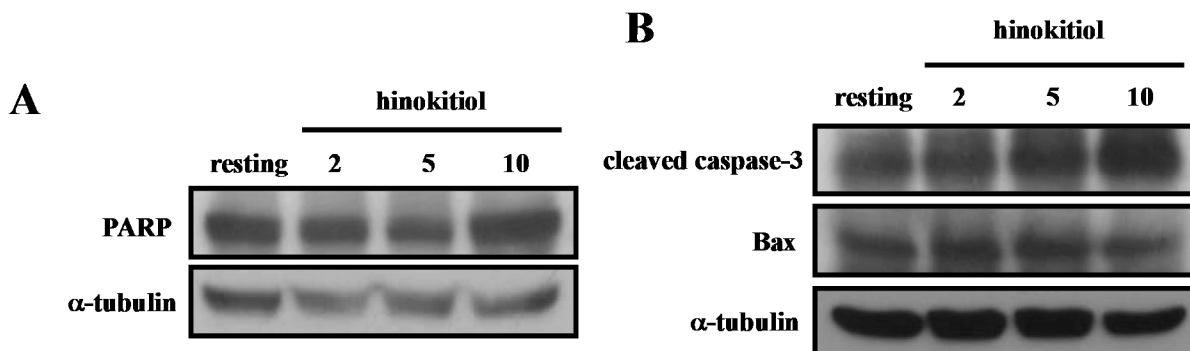

**Figure S1.** Effect of hinokitiol on PARP, cleaved caspase-3, and Bax expression in VSMCs. VSMCs were pre-treated in the presence or absence of hiokitiol (2–10  $\mu$ M) for 24 h, and the cells were then lysed. The level of (A) PARP, (B) cleaved caspase-3, and Bax was analyzed by SDS-PAGE and immunoblotting. Data are representative of two separated experiments with similar results.

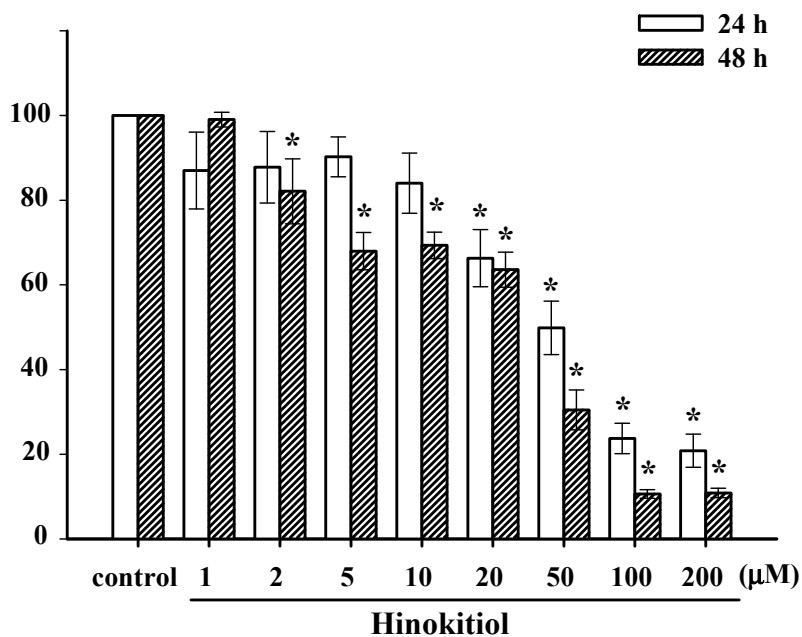

**Figure S2.** Effects of hinokitiol on cell proliferation of vascular smooth muscle cells (VSMCs). VSMCs were co-treated with hinokitiol (1–200  $\mu$ M) for 24 or 48 h, and cell proliferation was determined using the MTT assay. Data are presented as the mean  $\pm$  S.E.M. ( $n = 3$ ). \*  $p < 0.05$  compared to the control group.
